# Supplementary material for: One-pot synthesis of reverse type-I In2O3@In2S3 core–shell nanoparticles
Source: Royal Society of Chemistry journal article supplement (doi:10.1039/b719176f), 2008-01-01
Supplement: b719176f.pdf [file b719176f.pdf]

## Supporting Information

### One-Pot Synthesis of Reverse Type-I $\text{In}_2\text{O}_3@\text{In}_2\text{S}_3$ Core-shell Nanoparticles

Zhaoyong Sun,<sup>a</sup> Amar Kumbhar,<sup>b</sup> Kai Sun,<sup>c</sup> Qingsheng Liu<sup>d</sup> and Jiye Fang<sup>\*ae</sup>

<sup>a</sup>Department of Chemistry, State University of New York at Binghamton, Binghamton, NY 13902, USA

<sup>b</sup>Electron Microscope Facility, Clemson University, Anderson, SC 29625, USA

<sup>c</sup>Electron Microbeam Analysis Laboratory, University of Michigan, Ann Arbor, MI 48109, USA

<sup>d</sup>Department of Chemistry, Texas A&M University, TX 77842, USA

<sup>e</sup>Multidisciplinary Program in Materials Science & Engineering, State University of New York at Binghamton, Binghamton, NY 13902, USA

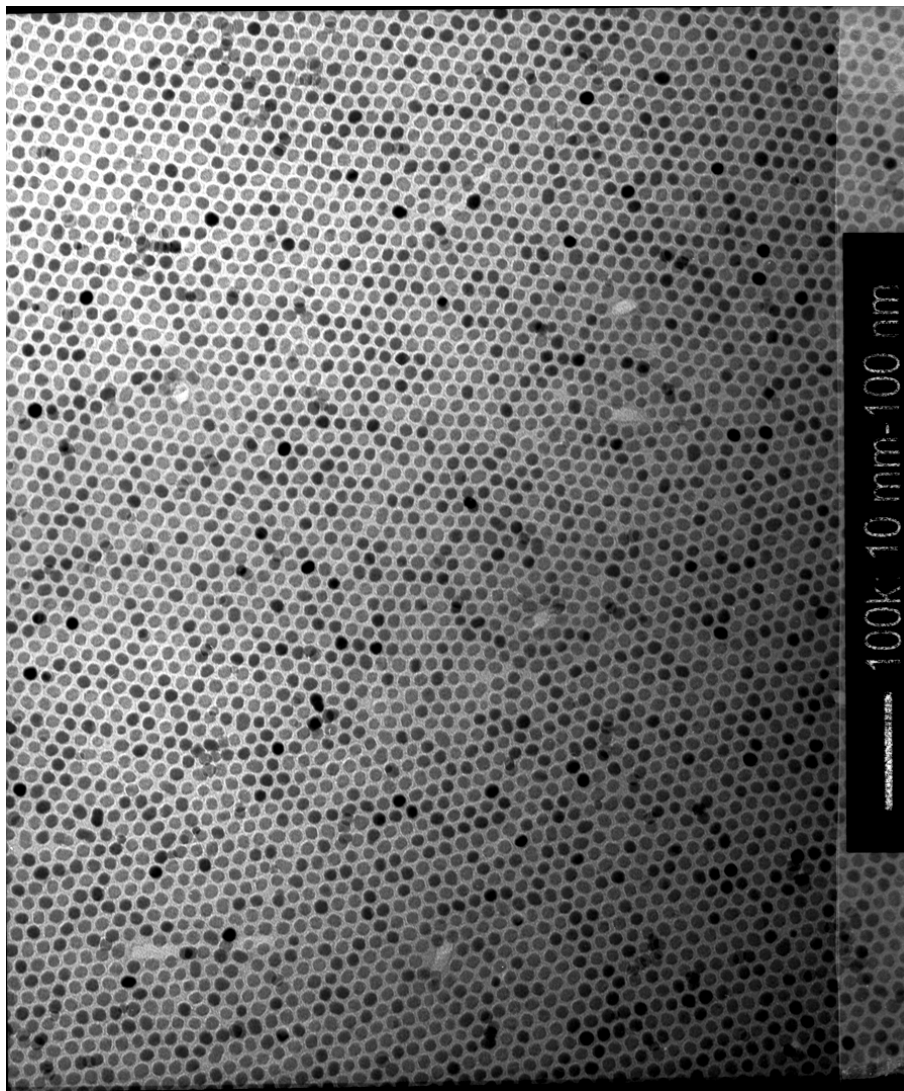

Figure S1a. TEM image of  $\text{In}_2\text{O}_3$  core nanocrystals.

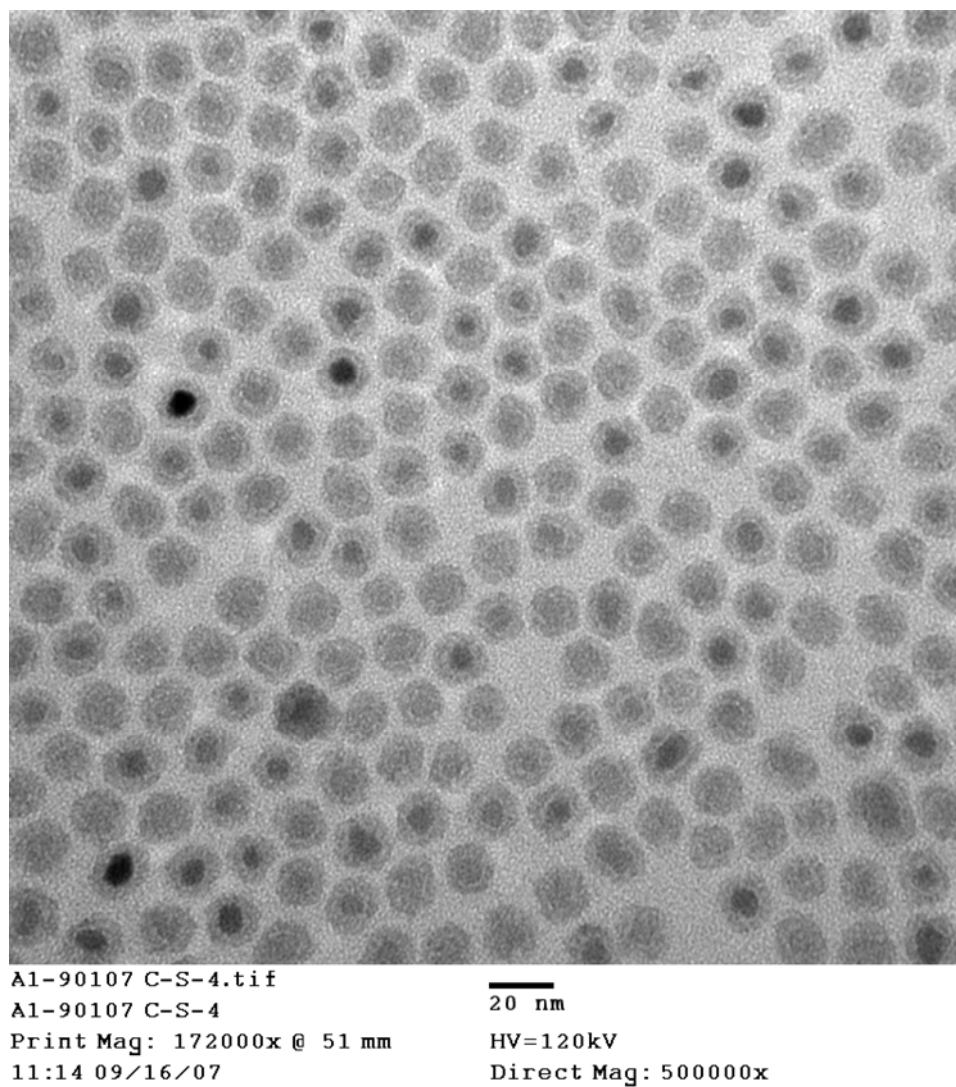

Figure S1b. TEM image of  $\text{In}_2\text{O}_3@\text{In}_2\text{S}_3$  core-shell nanoparticles.

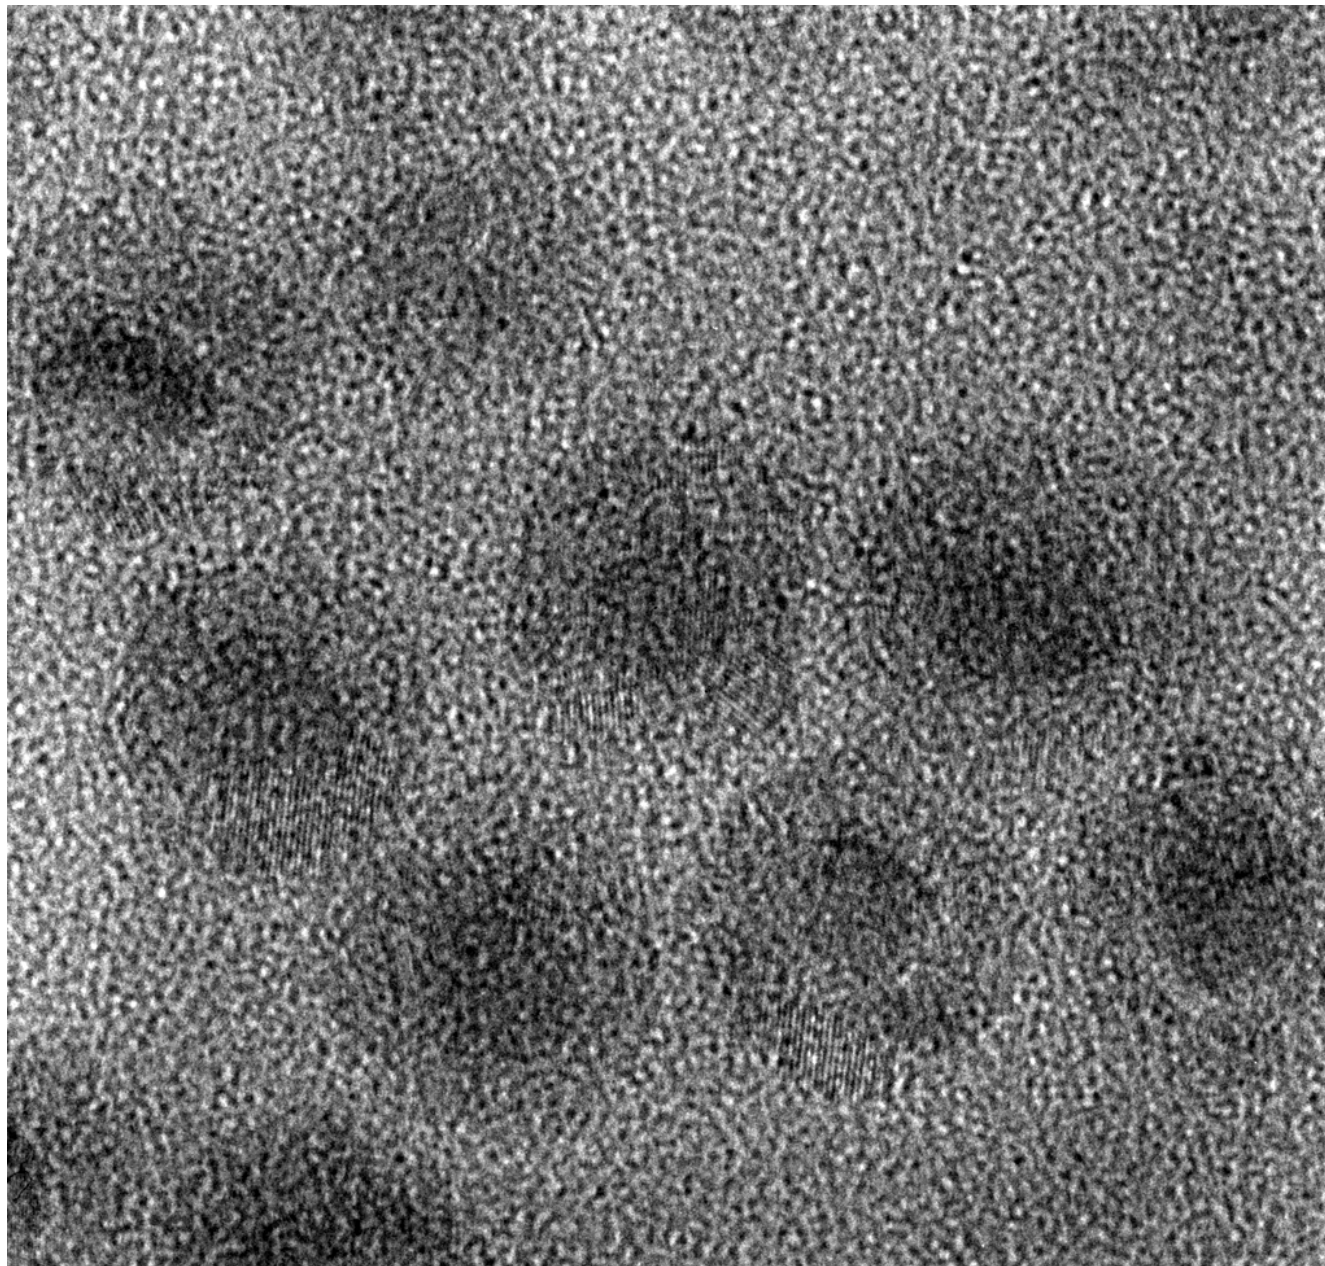

Figure S1c. High-resolution TEM image of In<sub>2</sub>O<sub>3</sub>-In<sub>2</sub>S<sub>3</sub> nanoparticles.

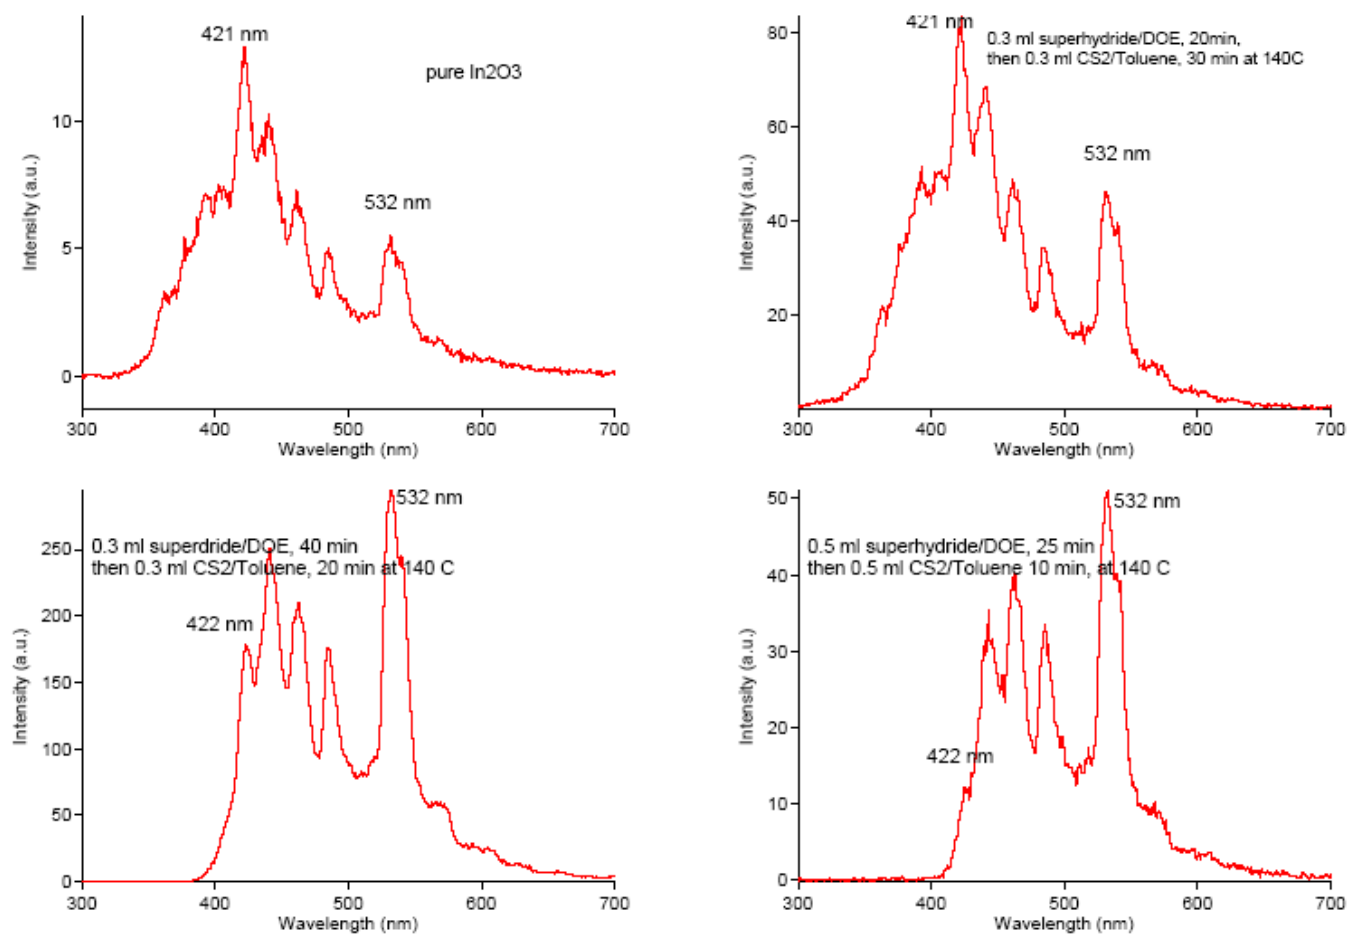

Figure S2. Photoluminescence spectra recorded with various reaction conditions, showing that the reduction step is more important than the sulfidization step for the formation of In<sub>2</sub>S<sub>3</sub> shell.
